# Supplementary material for: RNA-Binding Protein HuR Promotes Airway Inflammation in a House Dust Mite-Induced Allergic Asthma Model
Source: PubMed Central journal article supplement (PMC8787712; doi:10.1089/jir.2021.0171), 2022-01-13
Supplement: Suppl_Figure1.pdf [file Suppl_Figure1.pdf]

## Supplementary Figure 1.

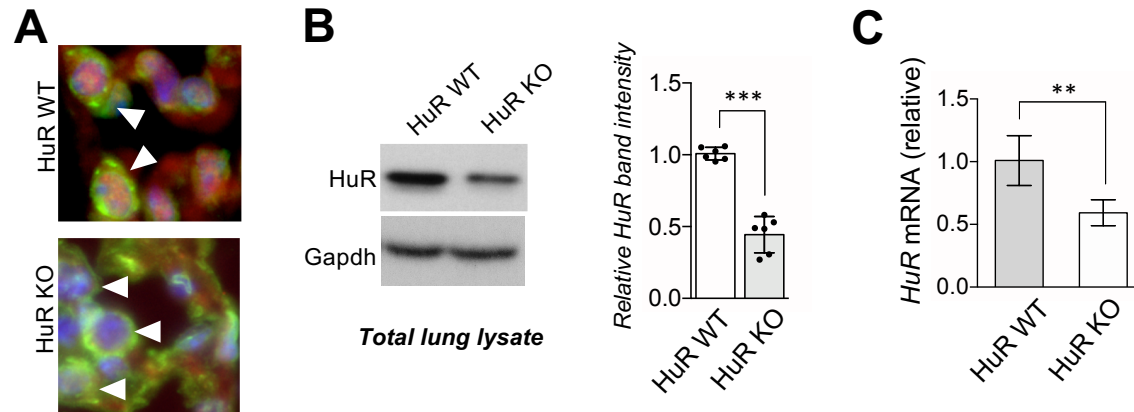

**Supplementary Figure 1. A.** Paraffin-embedded sections of SPCrtTA/tetO-CRE/ HuR<sup>flx/flx</sup> (HuR-KO) and SPCrtTA /tetO-CRE/ HuR<sup>flx/wt</sup> (HuR WT) lungs were stained for HuR (red) and pro-SP-C (green), DAPI (blue) stained the nucleus. A subset of alveolar type II cells (pro-SP-C) is indicated with arrowheads.

**B.** Left: western blot analysis of HuR and Gapdh in lung homogenates from HuR<sup>flx/wt</sup> (HuR WT) and HuR<sup>flx/flx</sup> (HuR KO) mice expressing SP-CrtTA/tetO-CRE (n = 6/group), treated as in Fig. 1A, right: western blots were quantified by densitometry using ImageJ. **C.** Lung tissue from mice in (B) was snap frozen in liquid nitrogen followed by RNA extraction and real-time RT-PCR analysis. Throughout figure, data represent mean and s.d of biological replicates. \**P* < 0.05, \*\**P* < 0.01 and \*\*\**P* < 0.001 by two-tailed Student t test; NS, not significant.
