# Supplementary material for: RNA-Binding Protein HuR Promotes Airway Inflammation in a House Dust Mite-Induced Allergic Asthma Model
Source: PubMed Central journal article supplement (PMC8787712; doi:10.1089/jir.2021.0171), 2022-01-13
Supplement: Suppl_Figure2.pdf [file Suppl_Figure2.pdf]

**Supplementary Figure 2.**

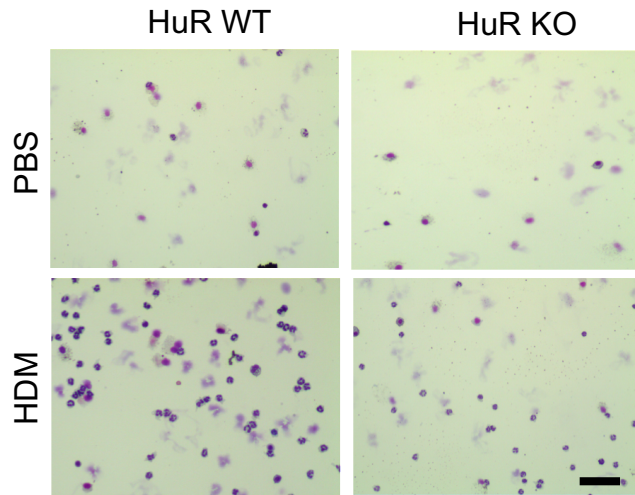

**Supplementary Figure 2.** Representative BAL fluid cytopins from the indicated mice, treated as described in Fig. 1 A ( $n = 6$  mice/ group), subjected to HEMA3 staining.
