# Supplementary material for: RNA-Binding Protein HuR Promotes Airway Inflammation in a House Dust Mite-Induced Allergic Asthma Model
Source: PubMed Central journal article supplement (PMC8787712; doi:10.1089/jir.2021.0171), 2022-01-13
Supplement: Suppl_Figure3.pdf [file Suppl_Figure3.pdf]

### Supplementary Figure 3.

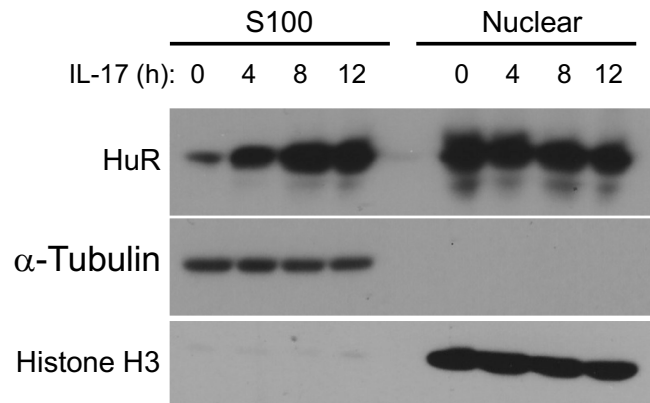

**Supplementary Figure 3.** Cell lysates from primary ASM cells either left untreated or treated with IL-17 (50 ng/ml) for indicated time were fractionated into cytosolic (S100), and nuclear fractions, as described in *Materials and Methods*, followed by Western blot analyses of  $\alpha$ -Tubulin, HuR, and Histone H3.
